# Supplementary material for: Characterisation of cytotoxicity and immunomodulatory effects of glycolipid biosurfactants on human keratinocytes
Source: PubMed Central journal article supplement (PMC9750927; doi:10.1007/s00253-022-12302-5), 2022-11-28
Supplement: 253_2022_12302_MOESM1_ESM.pdf [file 253_2022_12302_MOESM1_ESM.pdf]

1 **APPLIED MICROBIOLOGY AND BIOTECHNOLOGY**

2  
3 Supplementary material for:

4  
5 **Characterisation of cytotoxicity and immunomodulatory effects of glycolipid biosurfactants on human**  
6 **keratinocytes**

7  
8 Simms A. Adu <sup>1</sup>, Matthew S. Twigg <sup>1</sup>, Patrick J. Naughton <sup>1</sup>, Roger Marchant <sup>1</sup> and Ibrahim M. Banat <sup>1</sup>, \*

9  
10 **\*Corresponding Author: Ibrahim M. Banat** [im.banat@ulster.ac.uk](mailto:im.banat@ulster.ac.uk)

11 Tel.: +44 (0) 2870-123-062

12  
13 <sup>1</sup>School of Biomedical Science, Ulster University, Coleraine BT52 1SA, UK.

14  
15 **ORCID**

16 SAA: 0000-0002-7822-1634

17 MST: 0000-0002-8601-1960

18 PJN: 0000-0001-5995-9468

19 RM: 0000-0001-5213-229X

20 IMB: 0000-0001-8964-2840

42 **Supplementary Figures**

43  
44  
45  
46

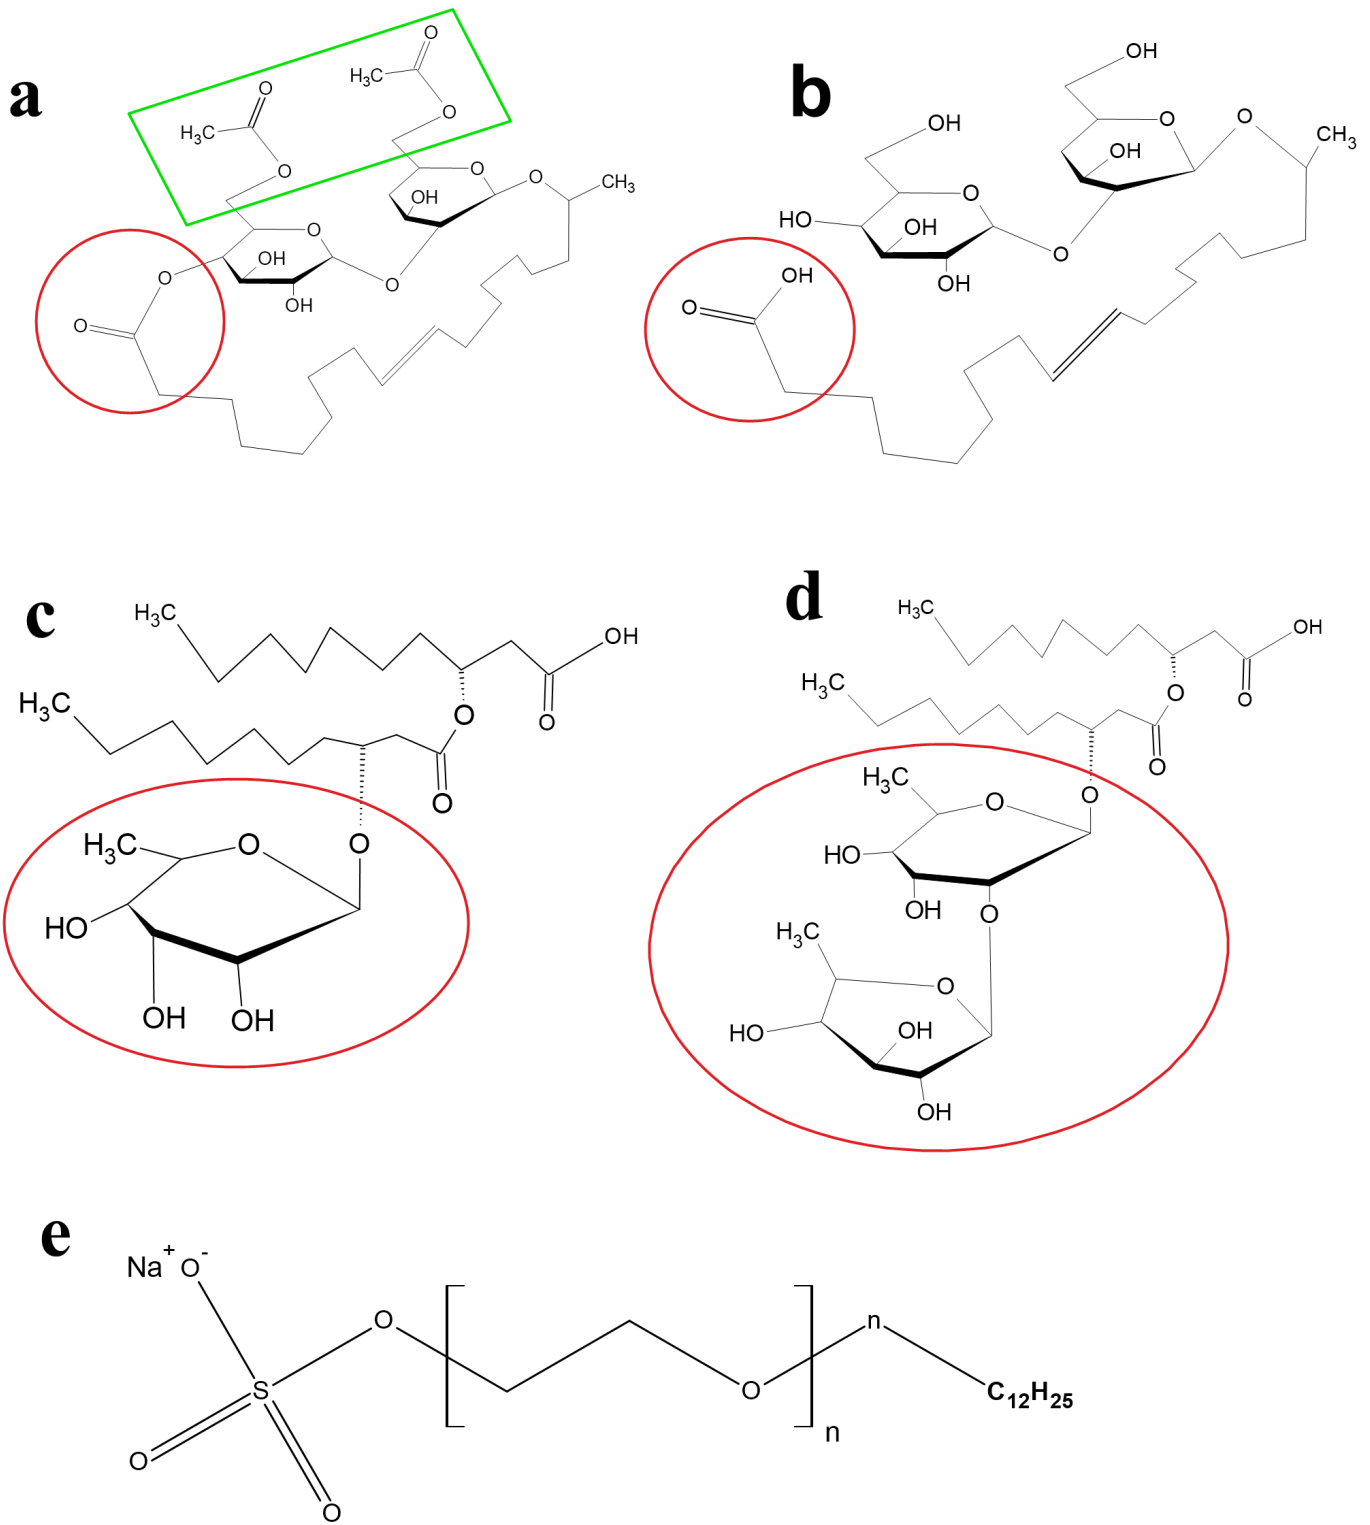

47  
48 **Fig. S1**  
49  
50  
51

52  
53  
54  
55  
56  
57  
58  
59  
60  
61  
62  
63  
64  
65  
66  
67  
68  
69  
70  
71  
72  
73  
74  
75  
76  
77  
78  
79  
80  
81  
82

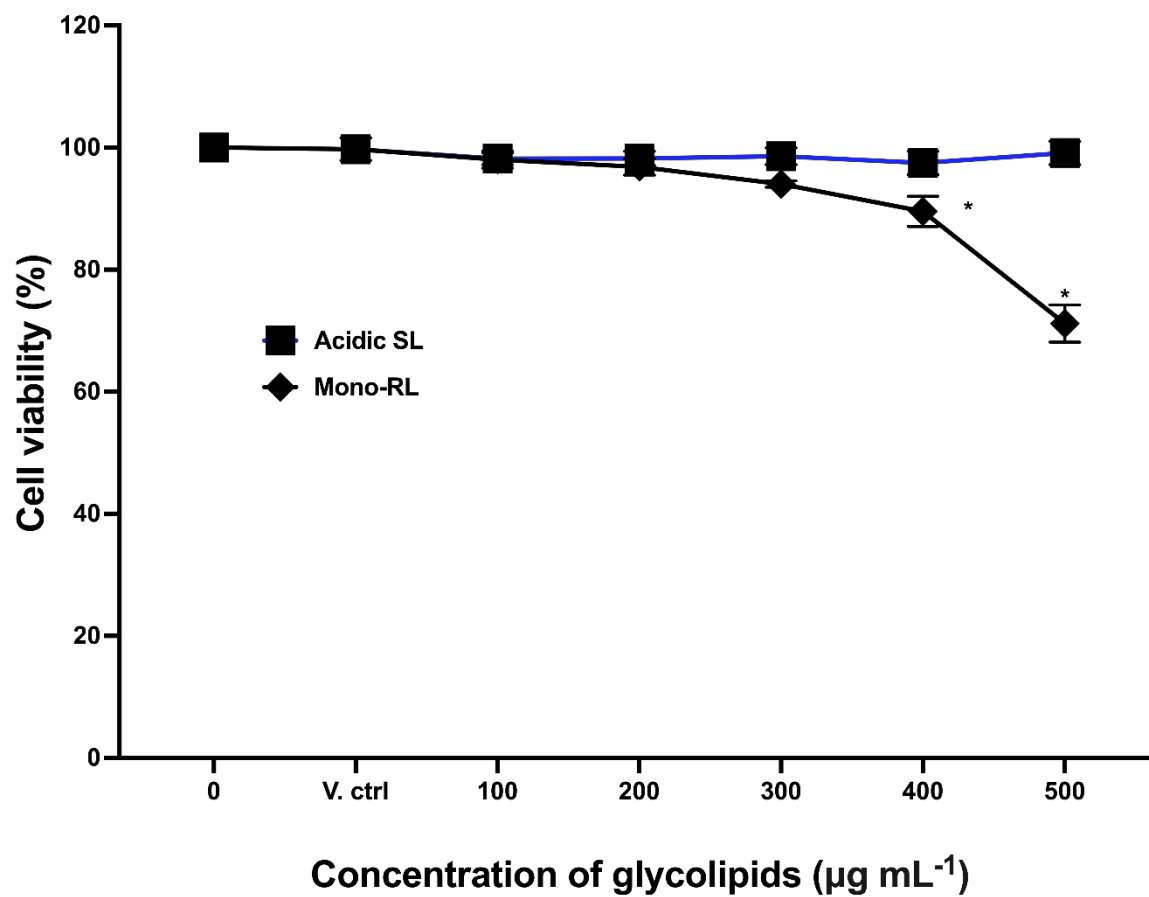

Fig. S2

83  
84  
85  
86  
87  
88  
89  
90  
91  
92  
93  
94  
95  
96  
97  
98  
99  
100

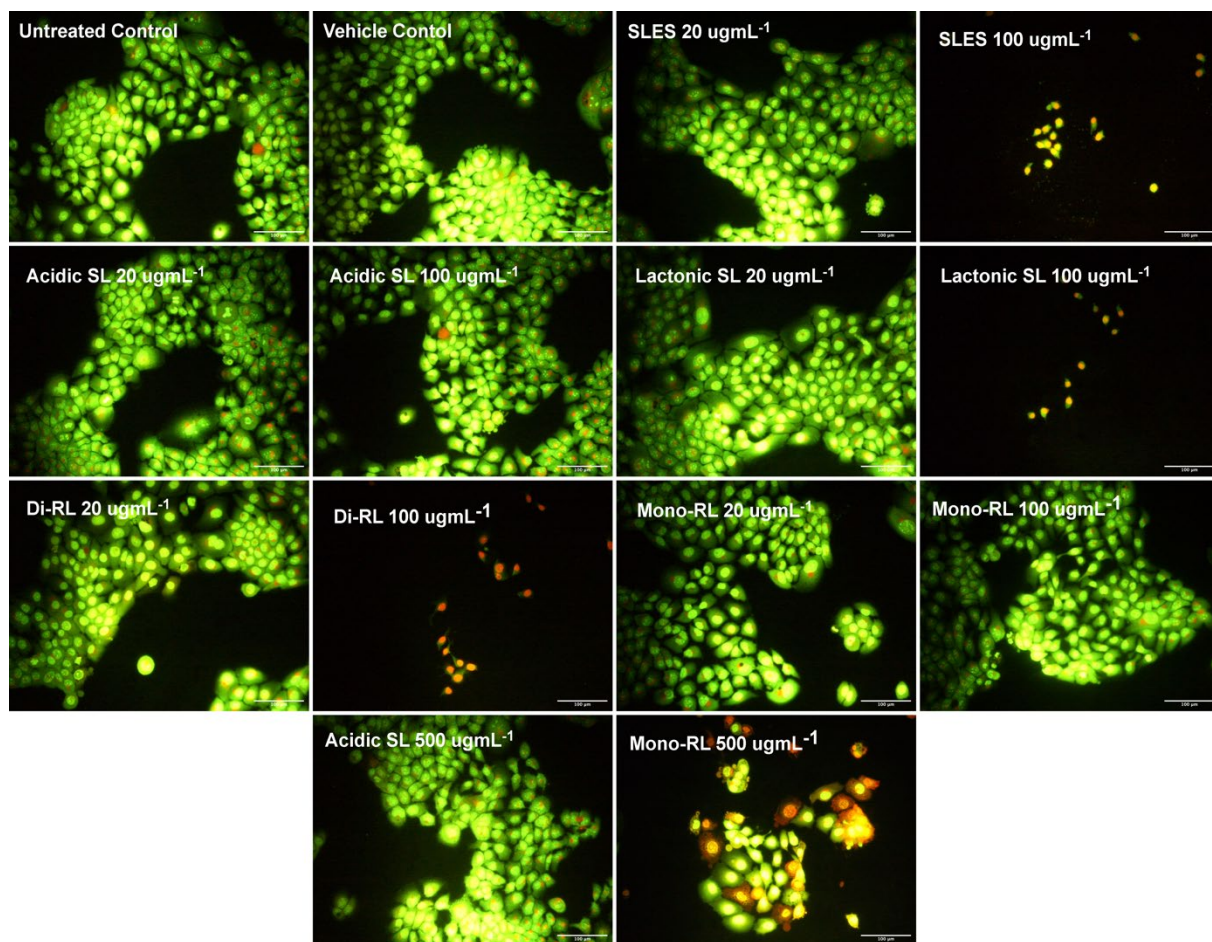

Fig. S3

101  
 102  
 103  
 104  
 105  
 106  
 107  
 108  
 109  
 110  
 111  
 112  
 113  
 114  
 115  
 116  
 117  
 118  
 119  
 120  
 121

122  
123  
124  
125  
126  
127  
128  
129  
130  
131  
132  
133  
134  
135

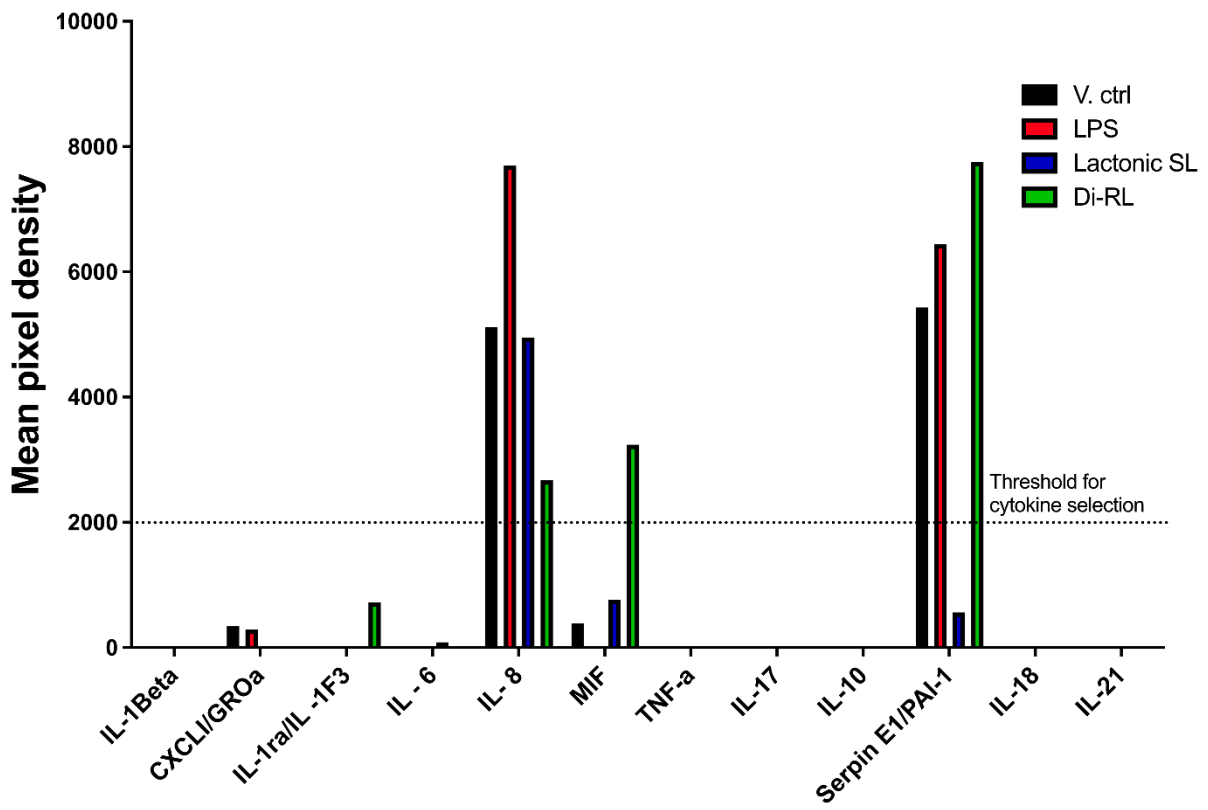

136  
137 Fig. S4

138  
139  
140  
141  
142  
143  
144  
145

146 **Supplementary figure legends**

147

148 **Fig. S1** Chemical structure of (a) Lactonic SL (di-acetylated with hydroxy fatty acid tail esterified at the 6' or 6''  
149 ends); (b) Acidic SL (non-acetylated with free fatty acid tail); (c) mono-RL (one rhamnose as hydrophilic moiety);  
150 (d) di-RL (two rhamnose as hydrophilic moiety) and (e) SLES. Figure adapted from Banat et al., 2010 and created  
151 with ChemSketch.com.

152

153 **Fig. S2** The effects of Acidic SL and Mono-RL on the viability of human keratinocytes at treatment concentrations  
154 between 100 and 500  $\mu\text{g mL}^{-1}$ . Data are the mean results of three independent experiments with each treatment  
155 group having six technical replicates, error bars represent standard error from the mean. Statistical significance  
156 was determined using a one-way ANOVA followed by Dunnett's Multiple comparison Test (\* =  $p \leq 0.05$ ).

157

158 **Fig. S3** The use of AO/PI dual staining technique to assess the morphological pattern of cell death induced by  
159 surfactant treatment. Fluorescent microscopy images at 200 x magnification of untreated HaCaT cells (Untreated  
160 control); cells treated with 1% methanol (v/v) (Vehicle control); preparations of each glycolipid congener and  
161 SLES at 20 and 100  $\mu\text{g mL}^{-1}$ . For Acidic SL and Mono-RL, treatment concentration was increased up to 500  $\mu\text{g}$   
162  $\text{mL}^{-1}$ . Three images per well were randomly selected and processed with ImageJ Software for scale bar attachment  
163 ; scale bar was set at 100  $\mu\text{m}$ .

164

165 **Fig. S4** Semi-quantitative pro-inflammatory cytokine profile of cell-free supernatant samples from HaCaT cells  
166 treated with 1% methanol (v/v) (V. ctrl); 25  $\mu\text{g mL}^{-1}$  LPS (positive control for the assay); or  $\text{LD}_{50}$  concentrations  
167 of Lactonic SL and Di-RL.

168

169

170

171

126 **Supplementary tables**

127

128 **Table S1** Sequences of primer sets and product length of pro/ anti-inflammatory markers used for RT-qPCR analysis. Primers were designed using NCBI Primer-BLAST  
129 software and sequences of primers were compared to the NCBI nucleotide data bases via BLASTn Search tool.

130

| <b>Primer</b> | <b>Gene</b>  | <b>Sequence (5' – 3')</b>       | <b>Amplicon Length (bp)</b> | <b>Annealing Temperature (°C)</b> |
|---------------|--------------|---------------------------------|-----------------------------|-----------------------------------|
| GAPDH SA-F    | <i>GAPDH</i> | TCG ACA GTC AGC CGC ATC TT      | 80                          | 49                                |
| GAPDH SA-R    | <i>GAPDH</i> | CTC CGA CCT TCA CCT TCC CC      | 80                          | 53                                |
| IL-8 SA-F     | <i>CXCL8</i> | ACA CTG CGC CAA CAC AGA AA      | 117                         | 47                                |
| IL-8 SA-R     | <i>CXCL8</i> | TTC TCA GCC CTC TTC AAA AAC TTC | 117                         | 49                                |
| IL-RA SA-F    | <i>IL1RN</i> | CCA AGA AGG CAA GAG CAA GCA     | 103                         | 49                                |
| IL-RA SA-R    | <i>IL1RN</i> | GCC CCA GCA GTT TAT GGG TT      | 103                         | 49                                |

131

132



133 **Table S2** Critical micelle concentration (CMC) determination of microbial glycolipids and SLES. Surface activity  
134 of glycolipids and SLES were analysed using KRUSS K10 ST digital tensiometer. CMC was estimated from 135  
136 extrapolated intercepts of values plotted on both the X and Y -axes of XY graph. All surface tension measurements  
137 were taken in triplicate.

| Surfactants | CMC (mg mL <sup>-1</sup> ) | Surface tension (mN m <sup>-1</sup> ) |
|-------------|----------------------------|---------------------------------------|
| Acidic SL   | 0.06                       | 43.00                                 |
| Lactonic SL | 0.06                       | 35.37                                 |
| Mono - RL   | 0.03                       | 41.60                                 |
| Di-RL       | 0.06                       | 28.70                                 |
| SLES        | 0.66                       | 32.20                                 |

138  
139  
140  
141  
142  
143  
144  
145  
146  
147  
148  
149  
150  
151  
152  
153
